# Supplementary material
Source: Elsevier journal article supplement (https://www.sciencedirect.com/science/article/pii/S1134593419300442)
Supplement: mmc1 [file S1134593419300442:mmc1.pdf]

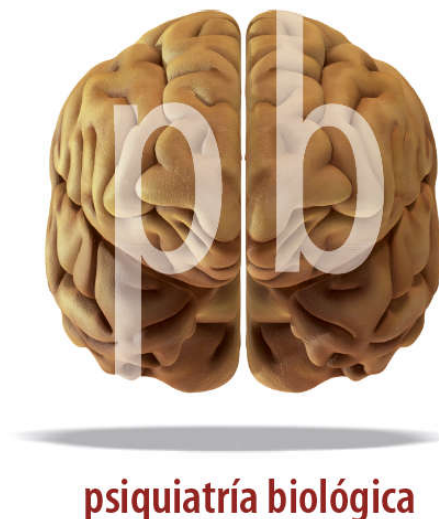

En Madrid, 3 de diciembre de 2018.

El artículo *“Inducción de manía por inhibidores de la colinesterasa: evidencia empírica a través de datos observacionales”*, del que son autores: Joaquin Gil-Badenes, Elena Guillot-Mergelina, Jon Iñaki Etxeandia-Pradera, Julio Sanjuan Arias y Eduard Vieta, ha sido evaluado y aceptado para su publicación por la revista *Psiquiatría Biológica*. Encontrándose actualmente en proceso de producción editorial.

A los efectos oportunos.

Fdo.: Prof.<sup>a</sup> Ana González-Pinto  
Editora  
*Psiquiatría Biológica*

Fdo.: Prof. Miquel Bernardo Arroyo  
Consejo Editorial  
*Psiquiatría Biológica*
